# Supplementary material for: Synthesis of electroactive multinuclear dipyrrinato complexes and Fe(iii) assisted formation of α-alkoxy substituted 5-ferrocenyldipyrromethenes
Source: Royal Society of Chemistry journal article supplement (doi:10.1039/c2dt30212h), 2012-01-01
Supplement: c2dt30212h.pdf [file c2dt30212h.pdf]

## Supporting Information

### Synthesis of Electroactive Multinuclear Dipyrrinato Complexes and Fe(III) Assisted Formation of $\alpha$ -Alkoxy Substituted 5-Ferrocenyldipyrromethenes

Rakesh Kumar Gupta, Rampal Pandey, Sanjeev Sharma and Daya Shankar Pandey\*

Department of Chemistry, Faculty of Science, Banaras Hindu University, Varanasi - 221 005  
(U.P.) India

#### Contents

1. NMR spectra of 1-8.....S2-S15
2. Interesting Motifs Resulting from weak interaction.....S16-S17
3. ESI-MS spectra of 1-5 .....S18-S23
4. CV and DPV of 3 and 4 in cathodic window.....S24-S25

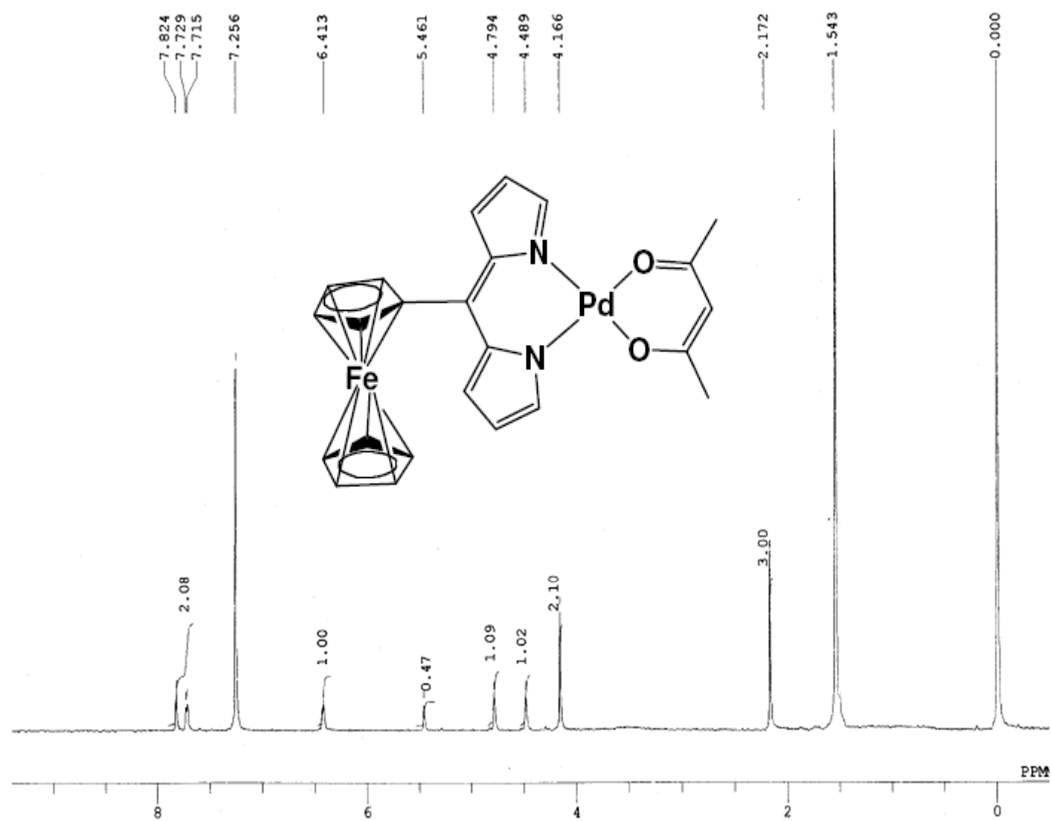

**Fig. S1**  $^1\text{H}$  NMR spectrum of **1** in  $\text{CDCl}_3$

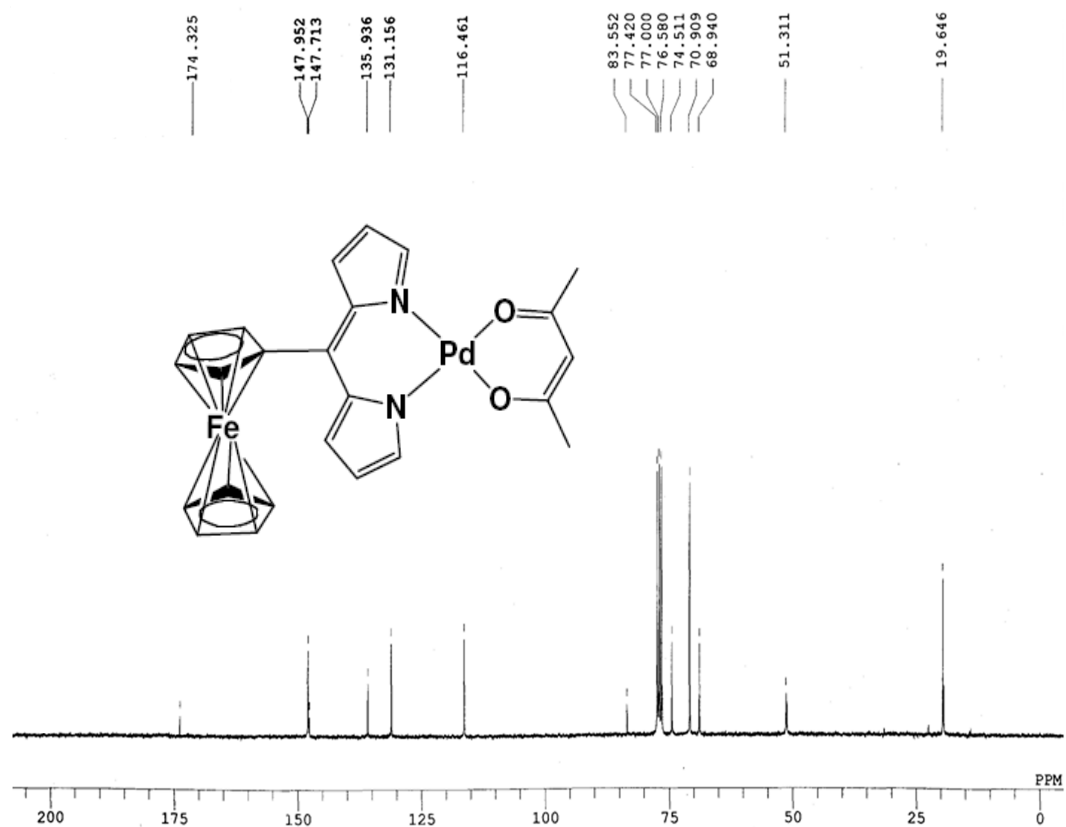

**Fig. S2**  $^{13}\text{C}$  NMR spectrum of **1** in  $\text{CDCl}_3$

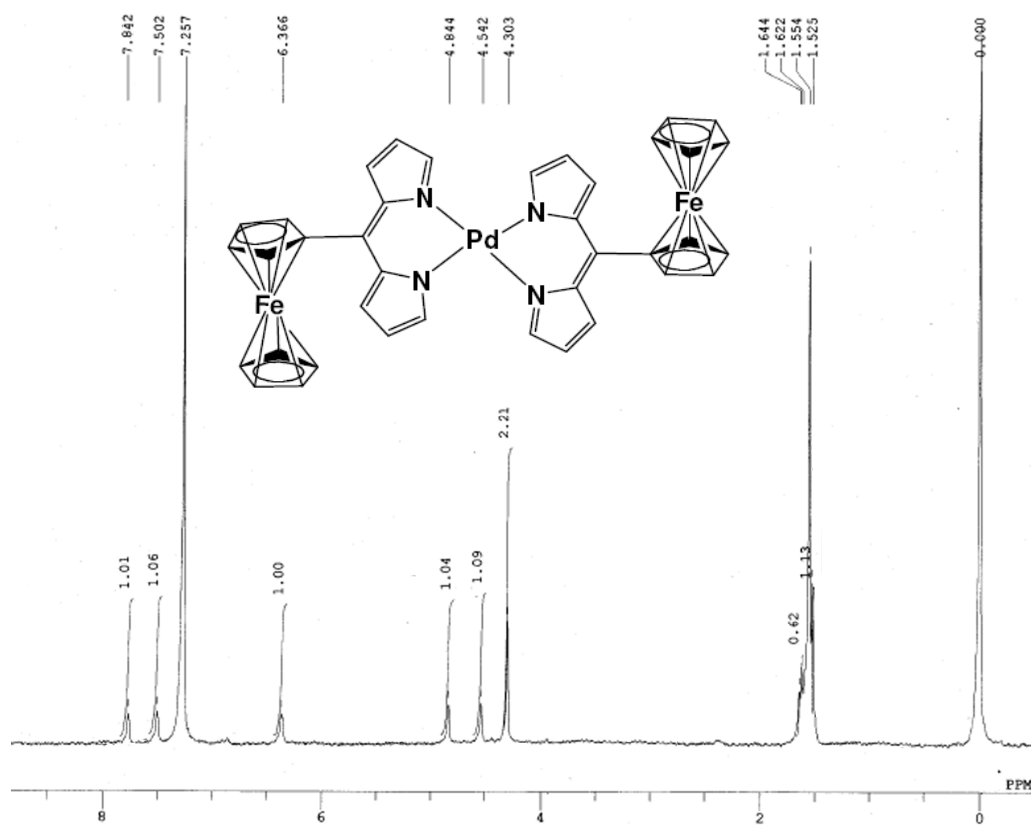

**Fig. S3** <sup>1</sup>H NMR spectrum of **2** in CDCl<sub>3</sub>

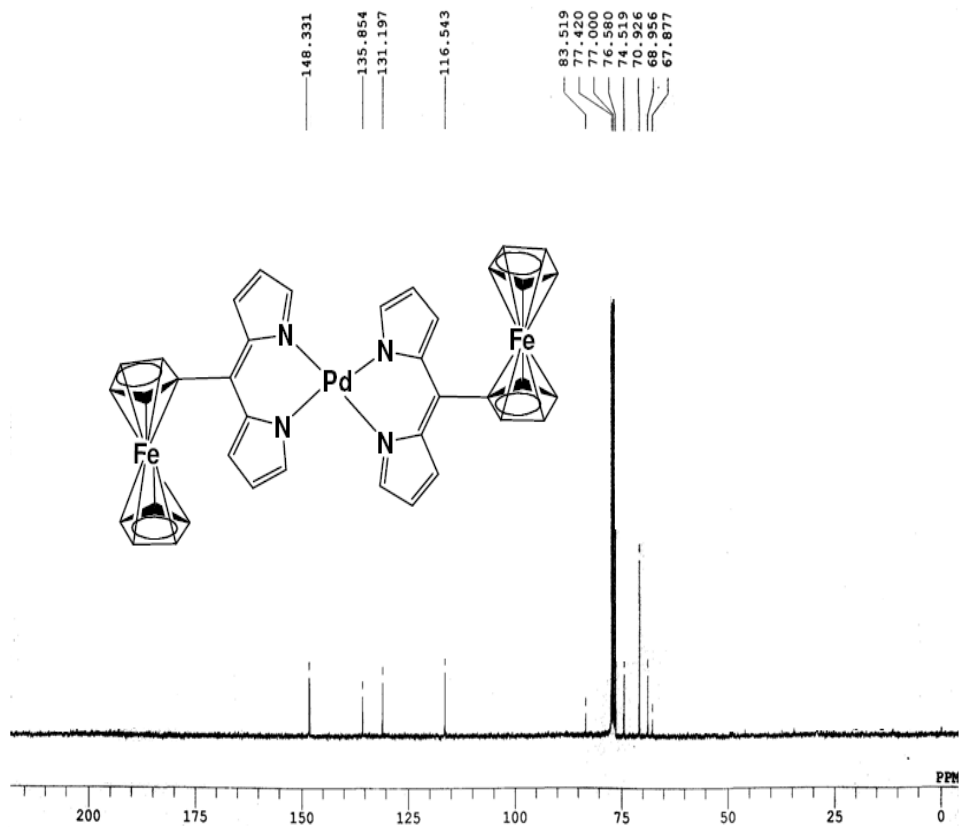

**Fig. S4**  $^{13}\text{C}$  NMR spectrum of **2** in  $\text{CDCl}_3$

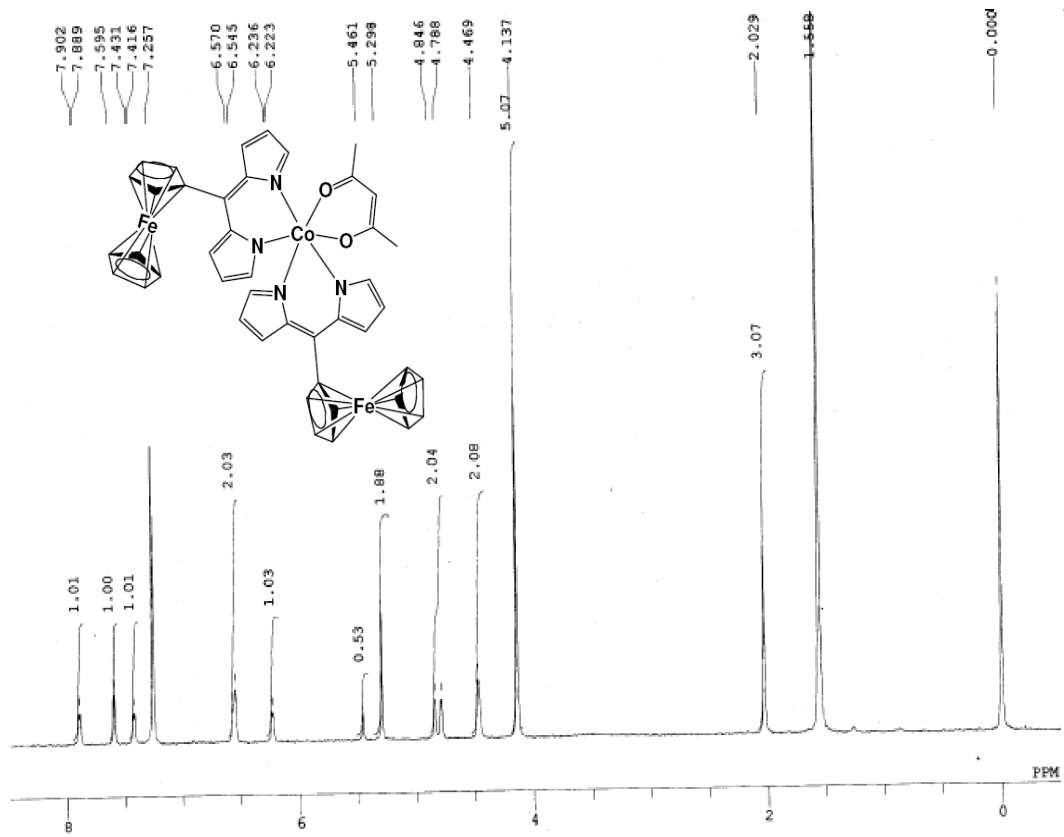

Fig. S5  $^1\text{H}$  NMR spectrum of **3** in  $\text{CDCl}_3$

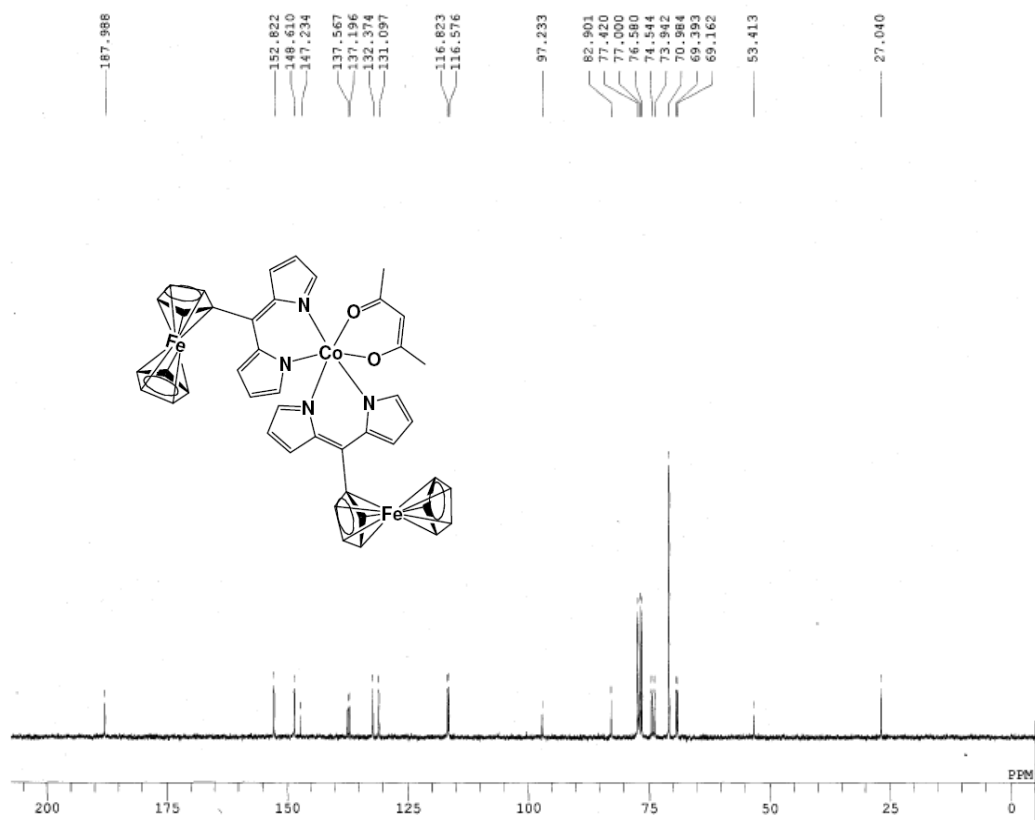

**Fig. S6** <sup>13</sup>C NMR spectrum of **3** in CDCl<sub>3</sub>

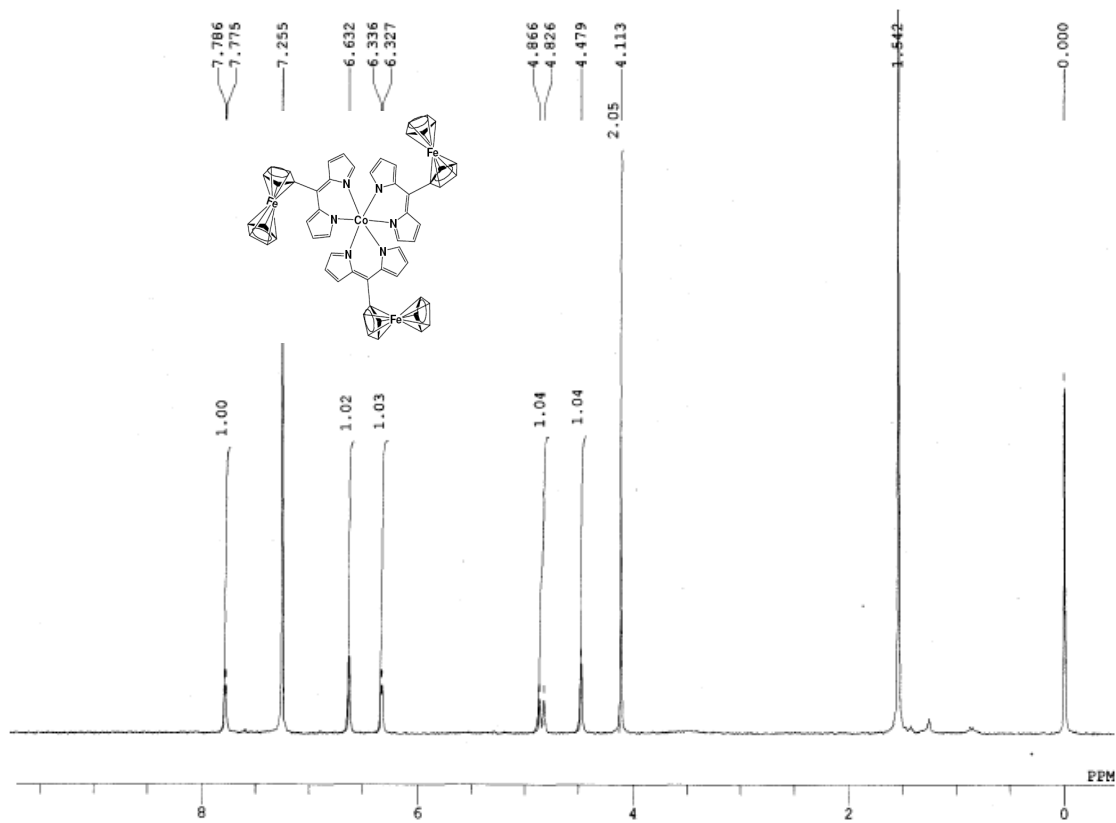

Fig. S7  $^1\text{H}$  NMR spectrum of **4** in  $\text{CDCl}_3$



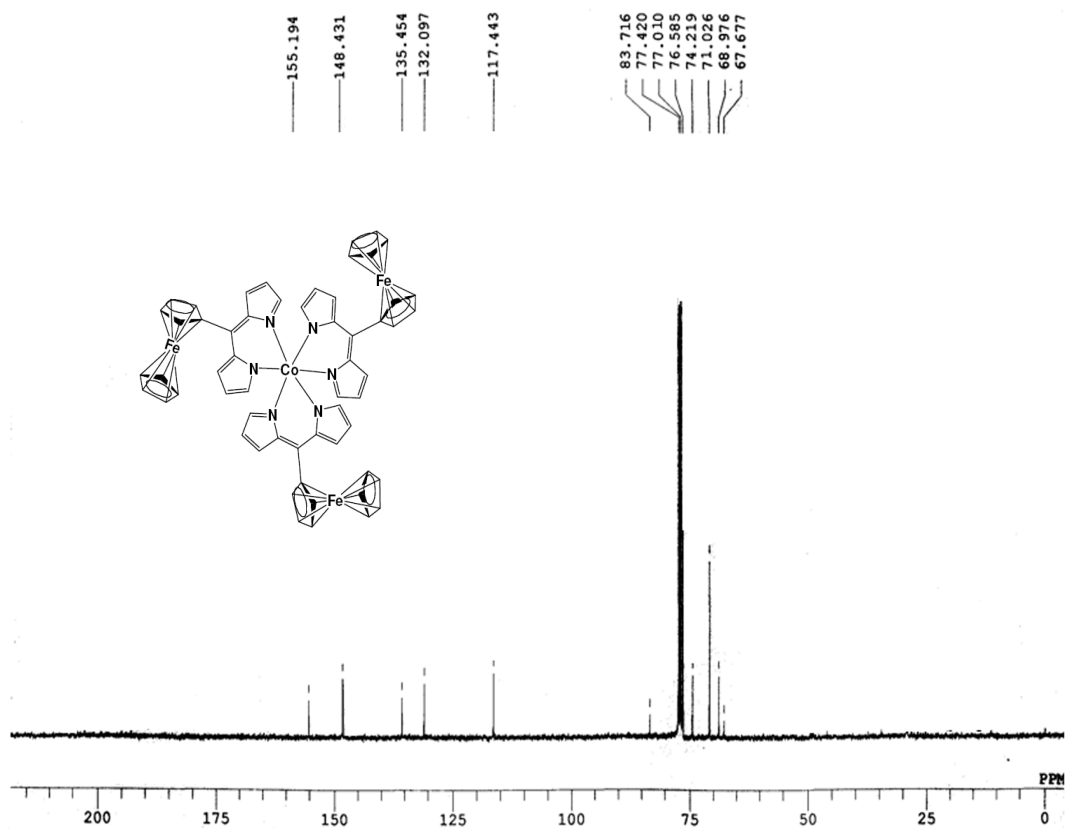

**Fig. S8**  $^{13}\text{C}$  NMR spectrum of **4** in  $\text{CDCl}_3$

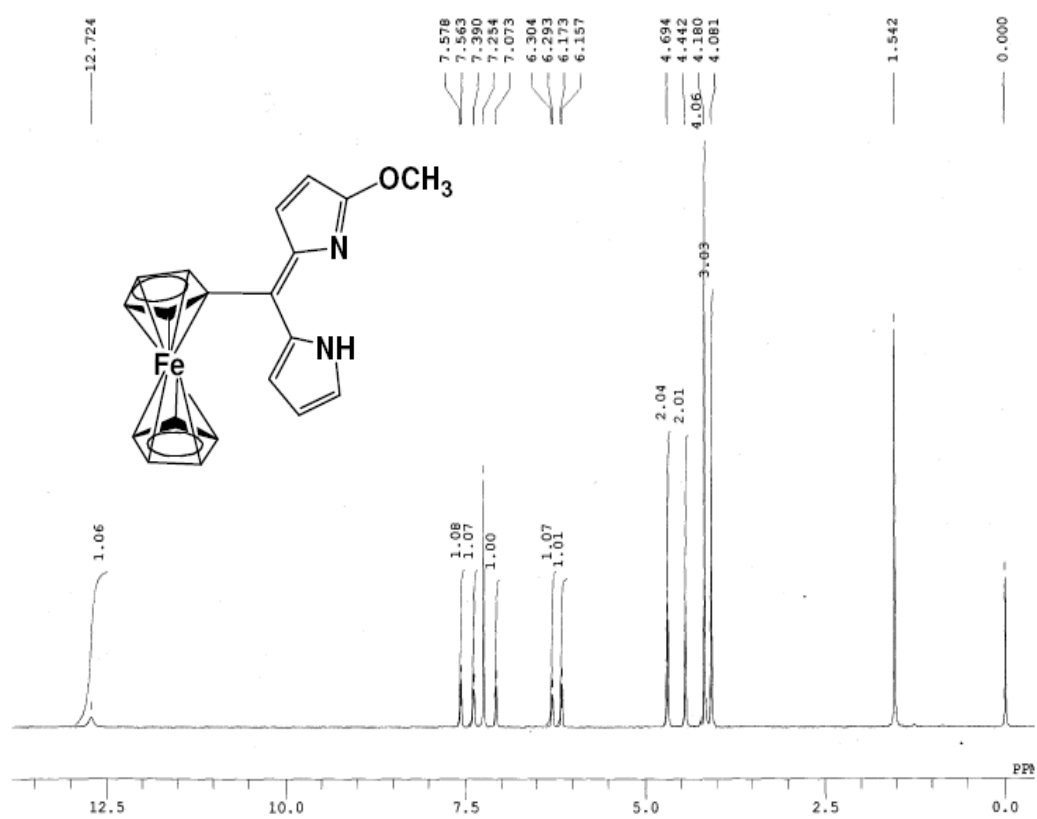

Fig. S9 <sup>1</sup>H NMR spectrum of **5** in CDCl<sub>3</sub>

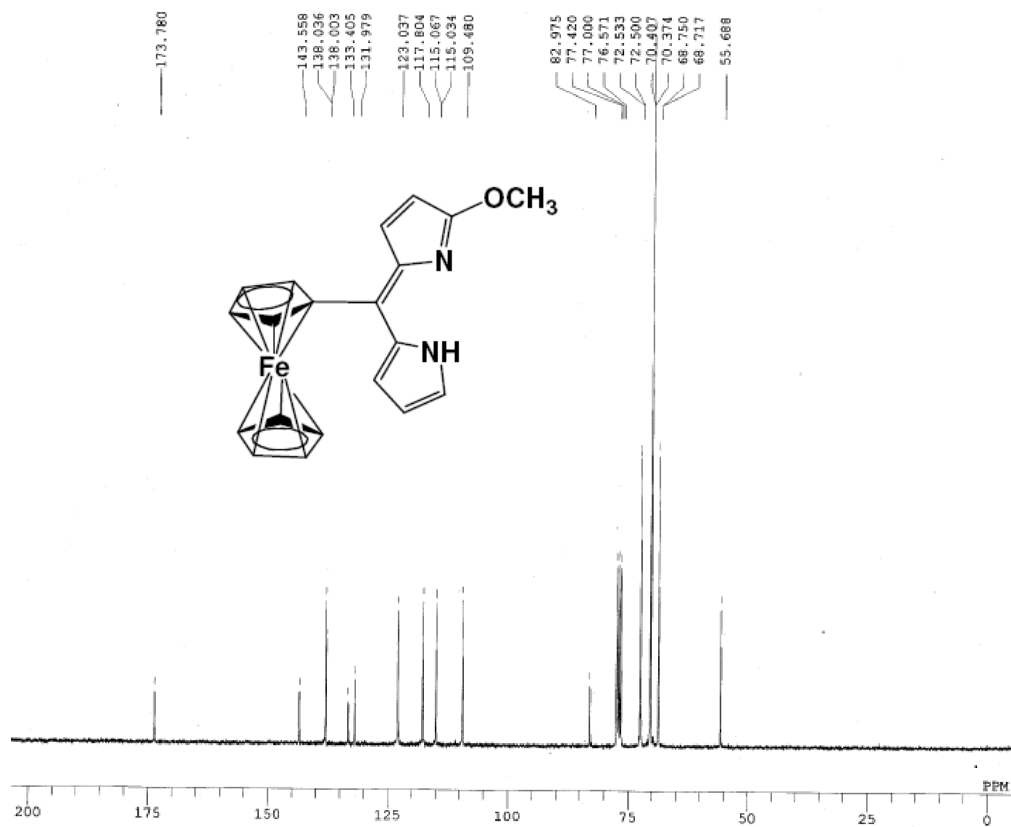

**Fig. S10**  $^{13}\text{C}$  NMR spectrum of **5** in  $\text{CDCl}_3$

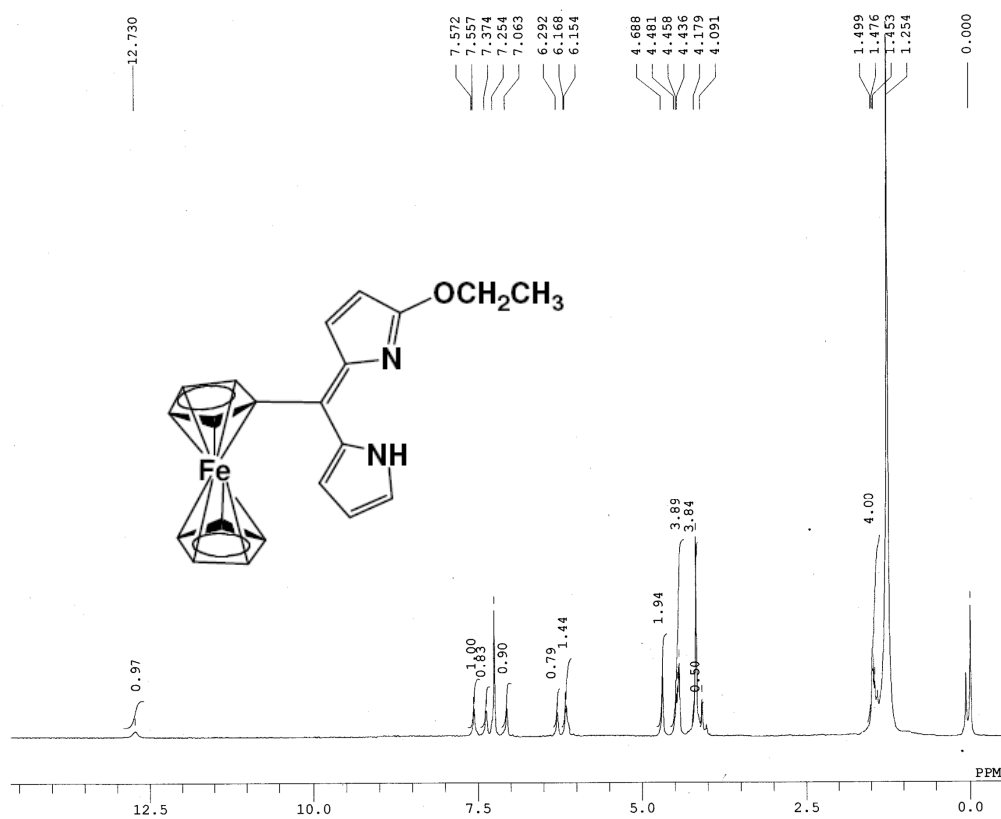

**Fig. S11**  $^1\text{H}$  NMR spectrum of **6** in  $\text{CDCl}_3$

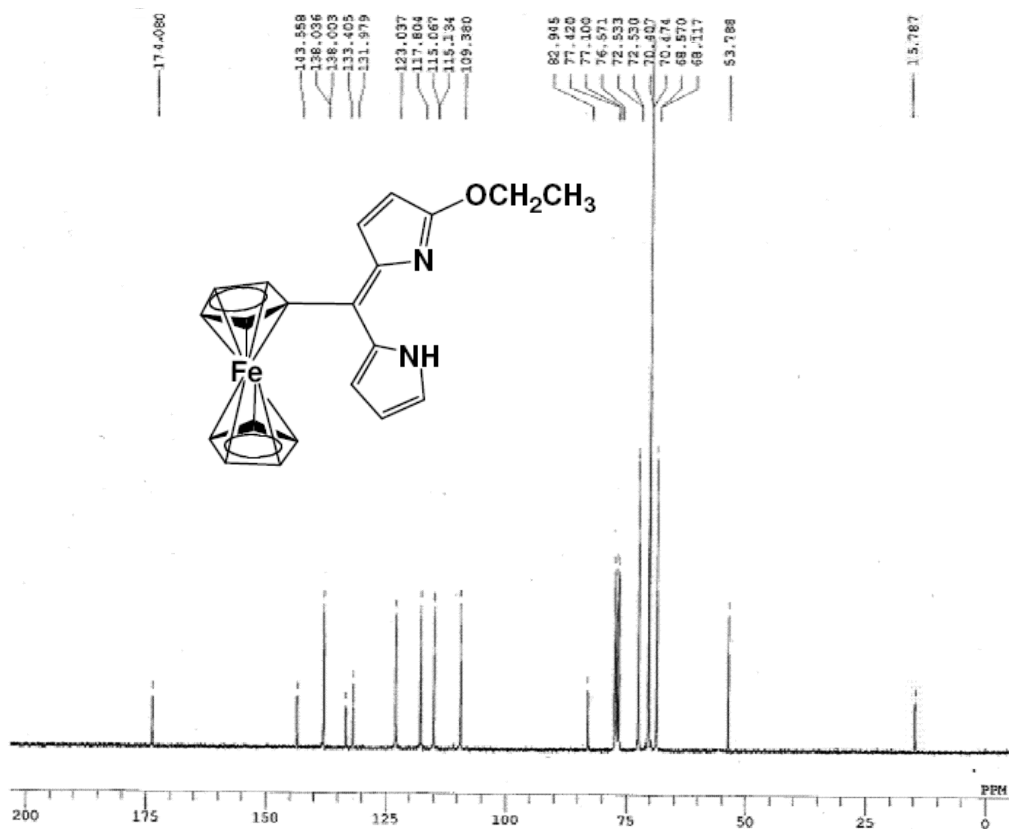

Fig. S12  $^{13}\text{C}$  NMR spectrum of **6** in  $\text{CDCl}_3$

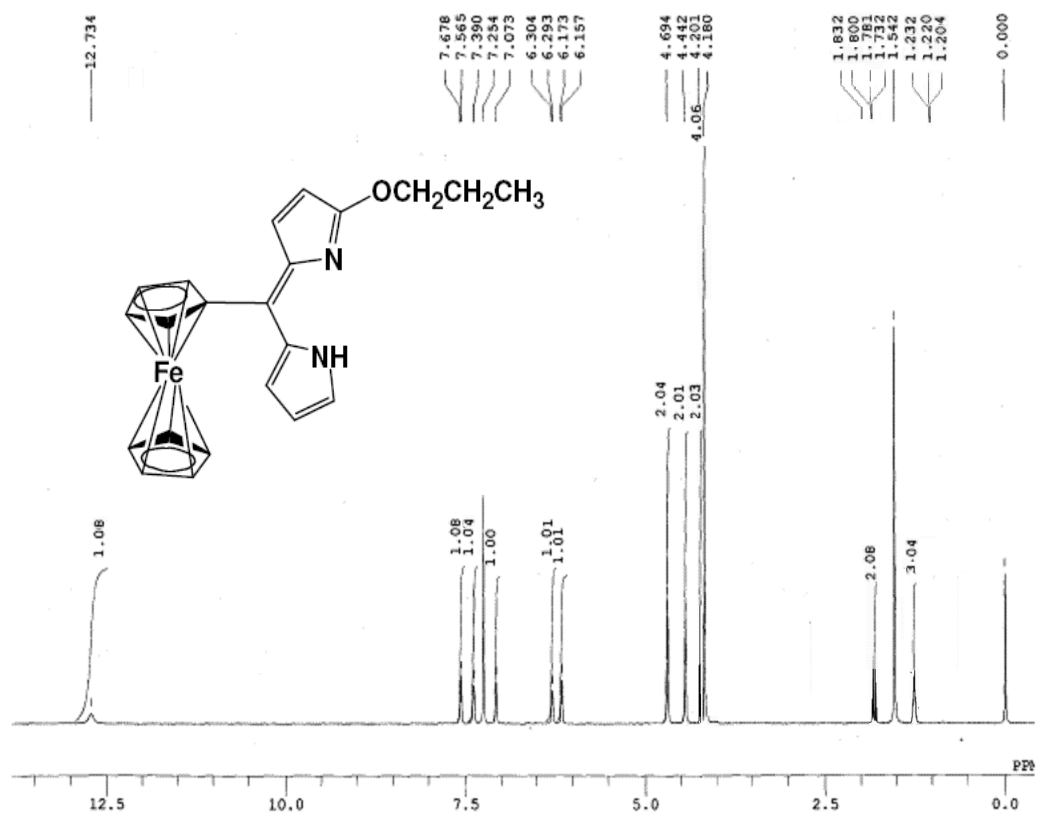

Fig. S13  $^1\text{H}$  NMR spectrum of **7** in  $\text{CDCl}_3$

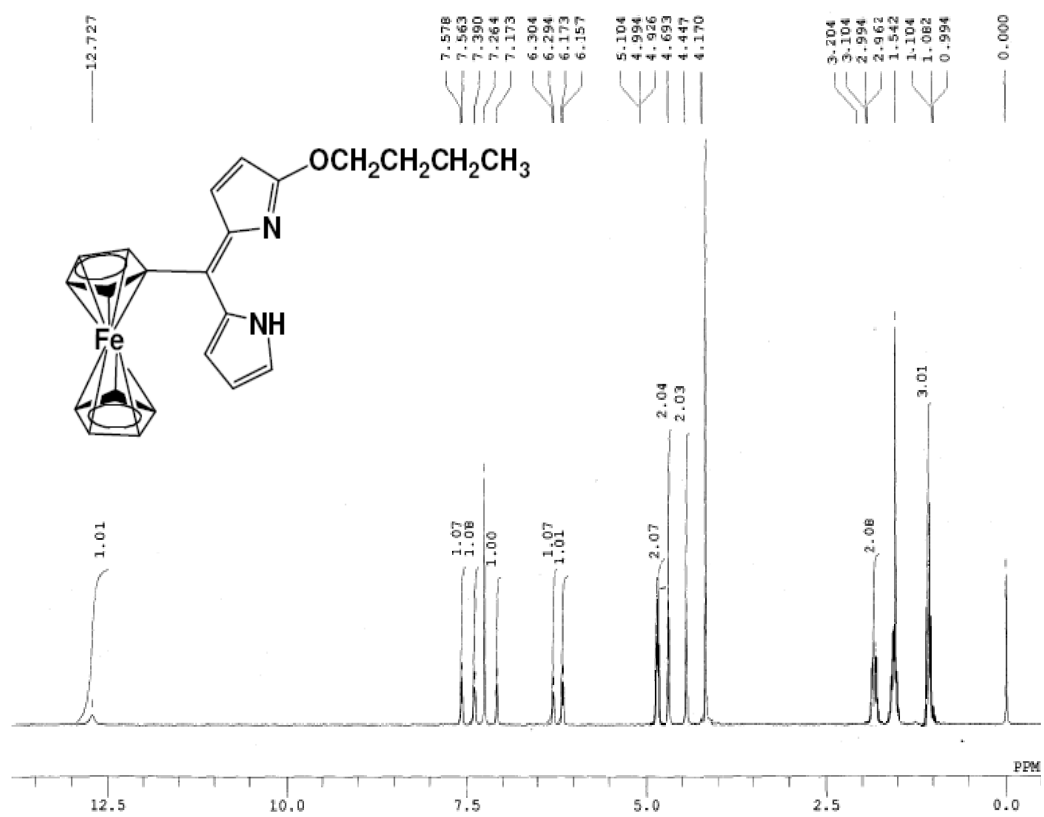

Fig. S14  $^1\text{H}$  NMR spectrum of **8** in  $\text{CDCl}_3$

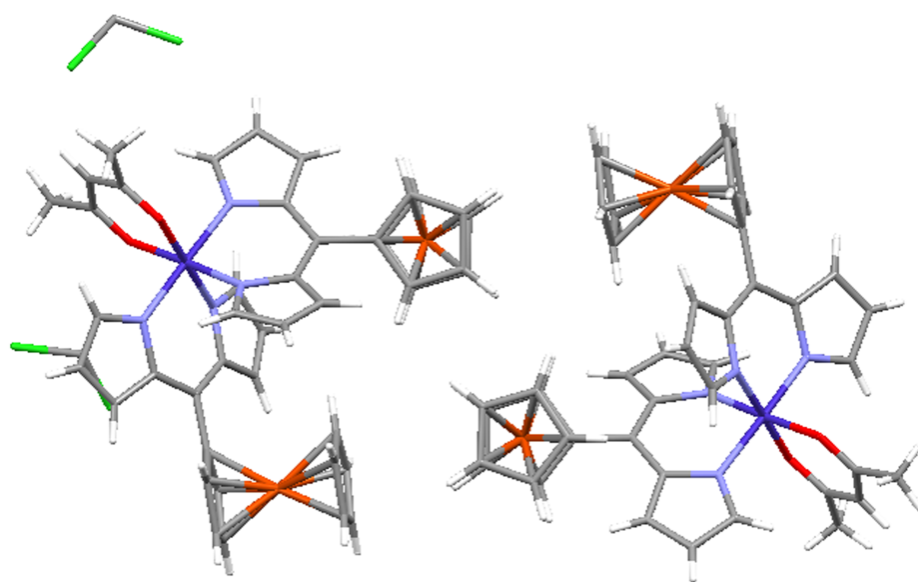

**Fig. S15** Head to tail arrangement in **3** resulting from C-H $\cdots\pi$  weak interactions



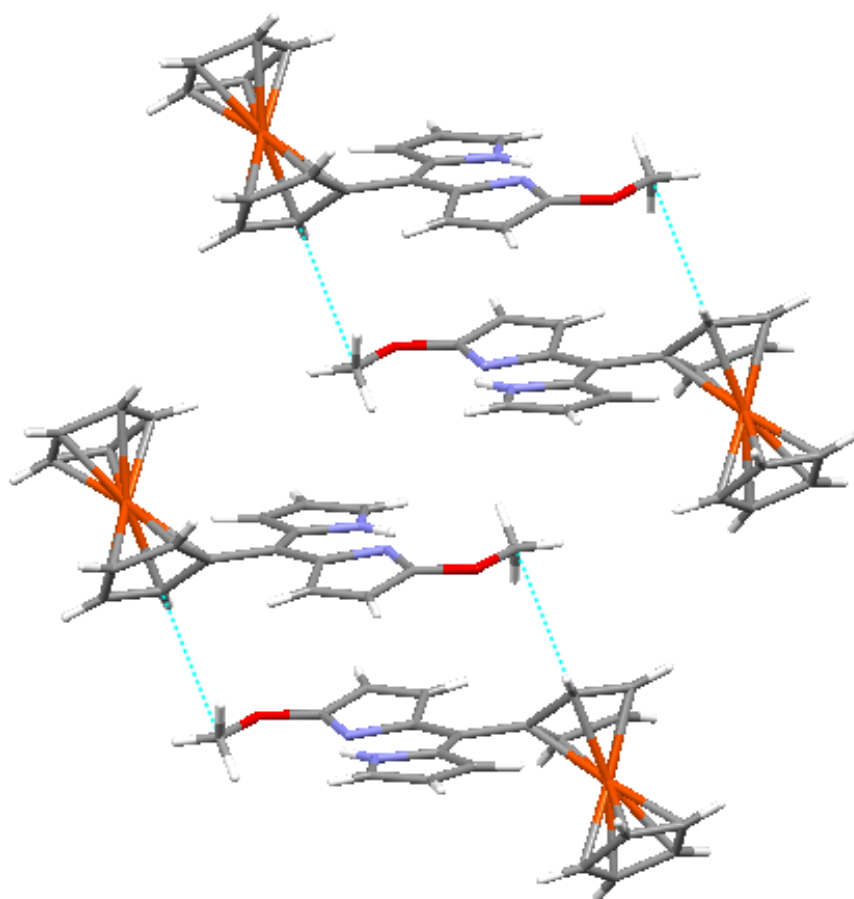

**Fig. S16** C-H... $\pi$  interactions leading to zig-zag motif in **5**

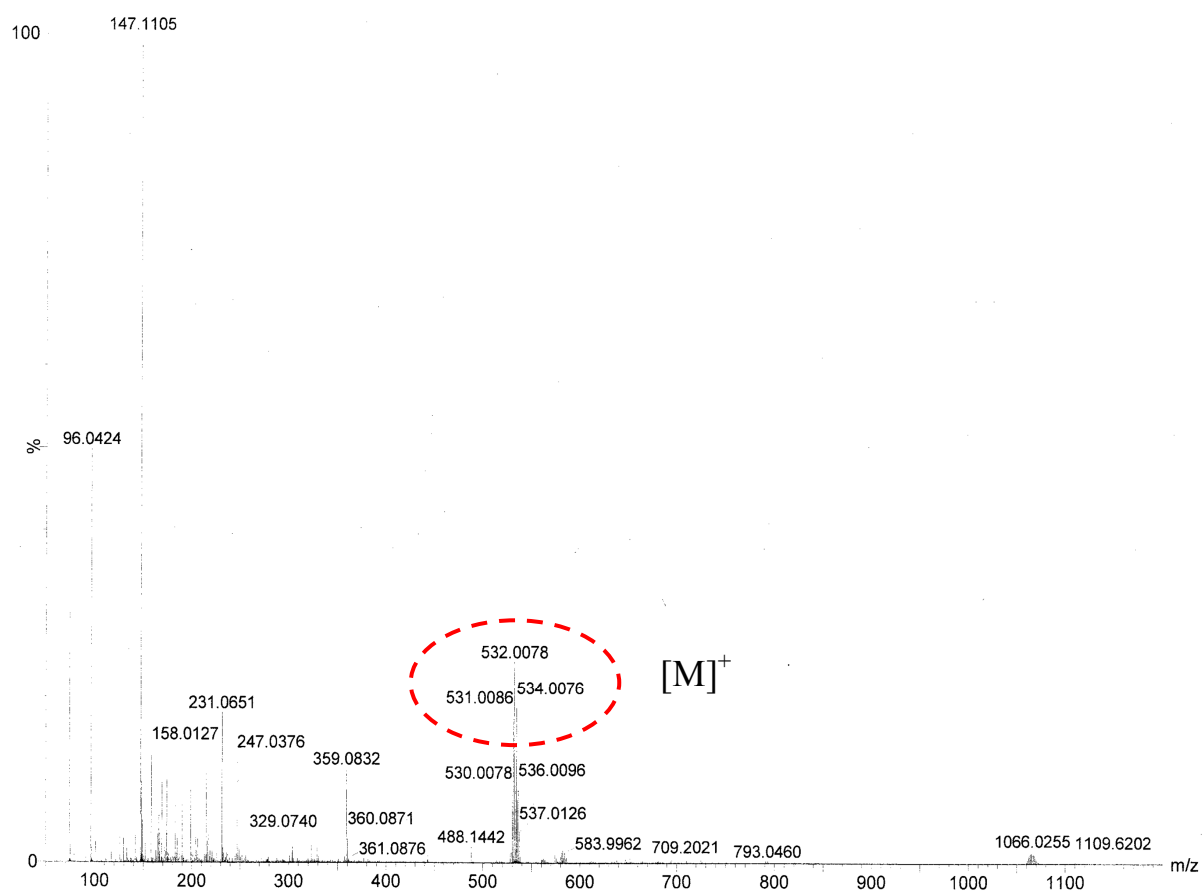

**Fig. S17** ESI-MS spectrum of **1**

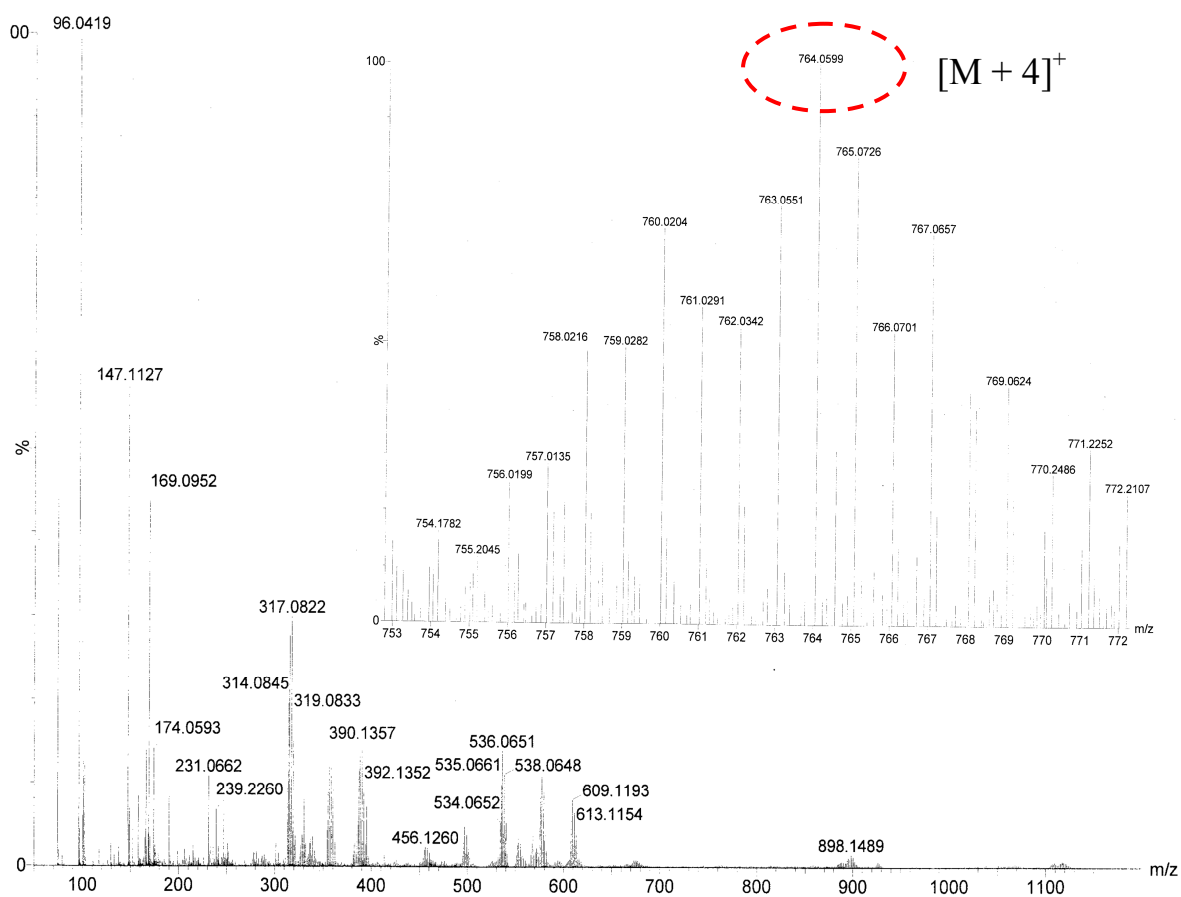

**Fig. S18** ESI-MS spectrum of **2**

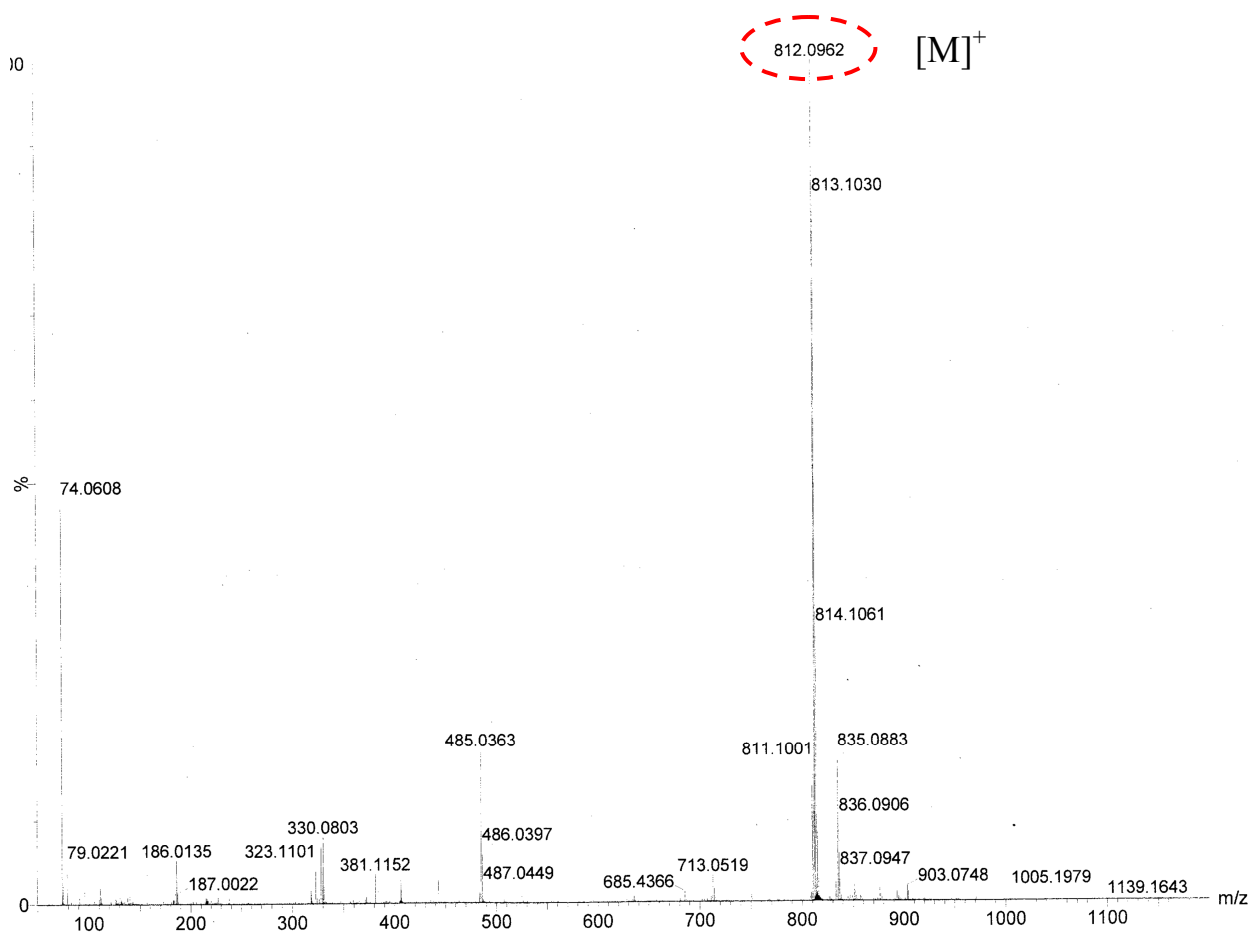

**Fig. S19** ESI-MS spectrum of **3**

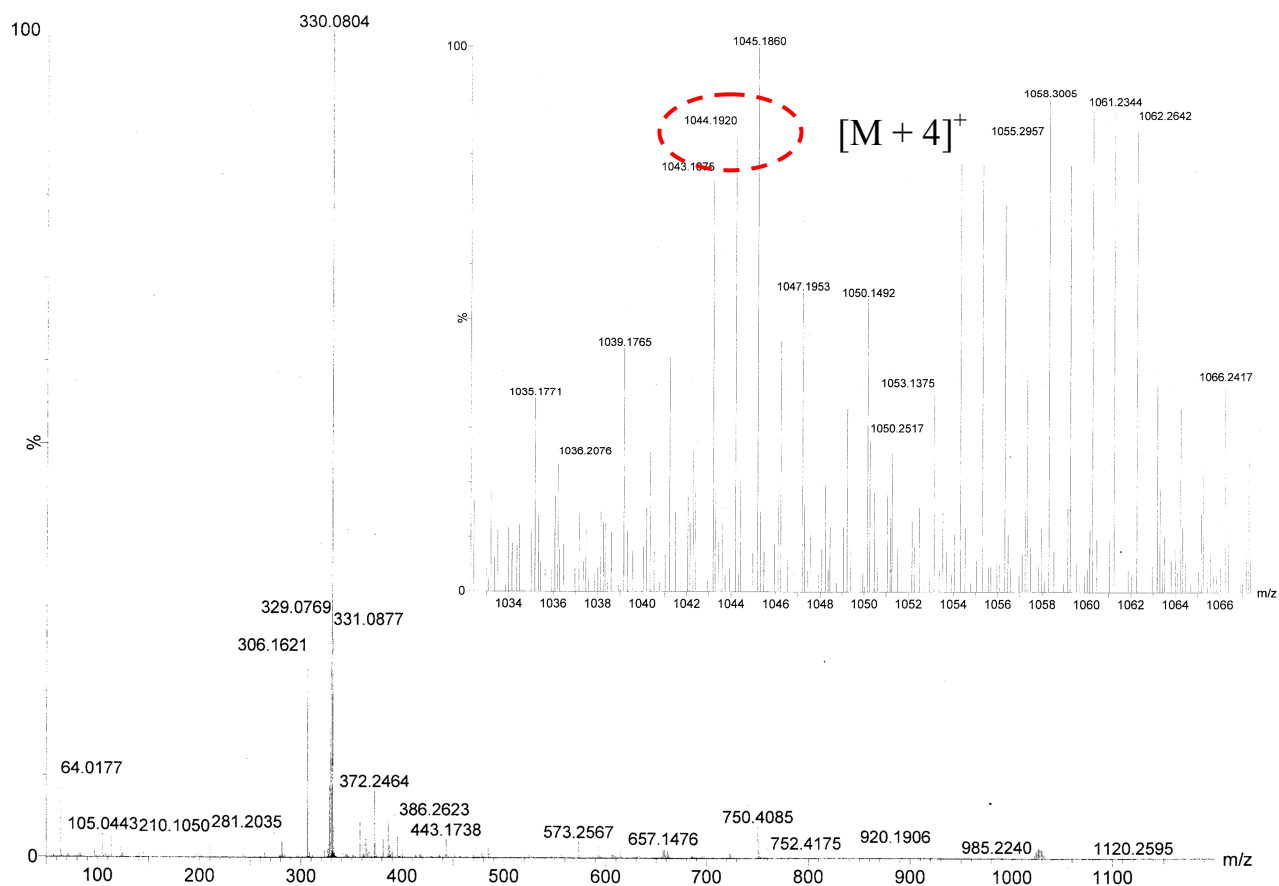

Fig. S20 ESI-MS spectrum of 4

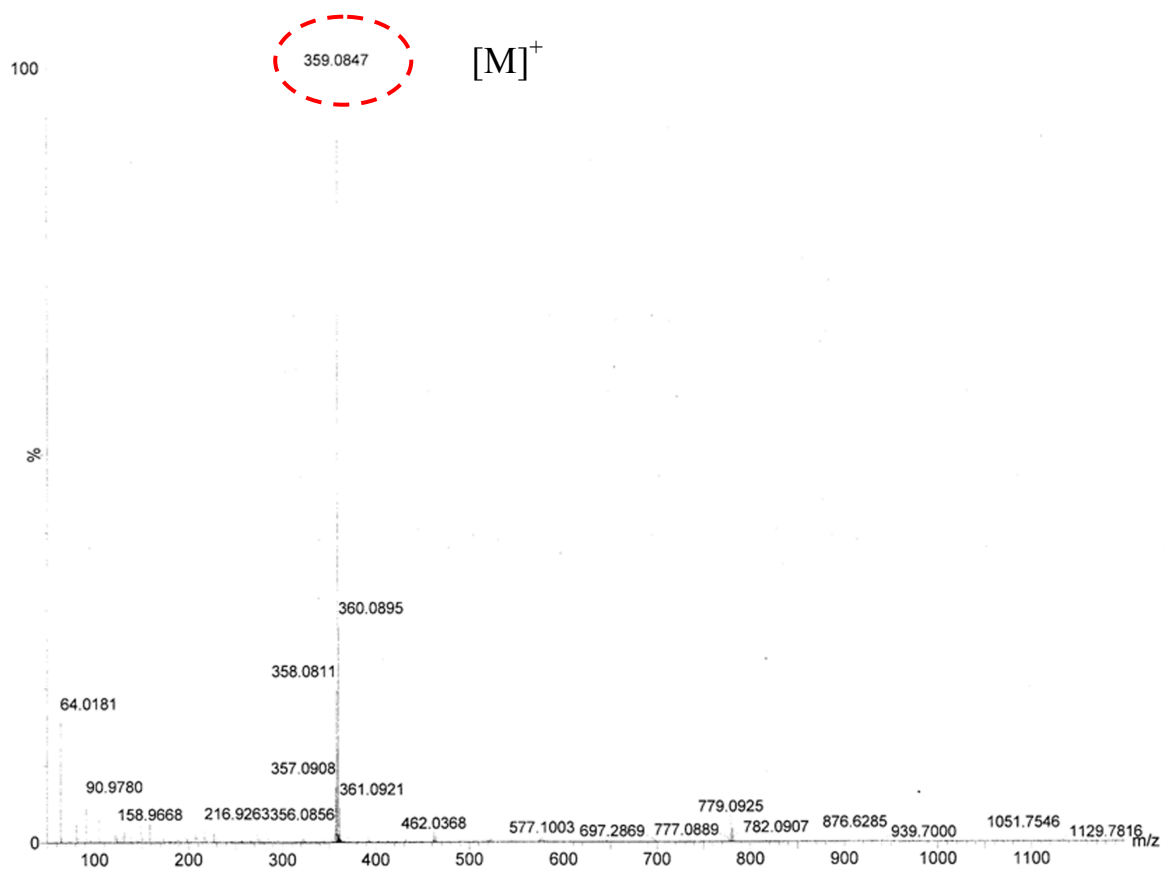

**Fig. S21** ESI-MS spectrum of **5**

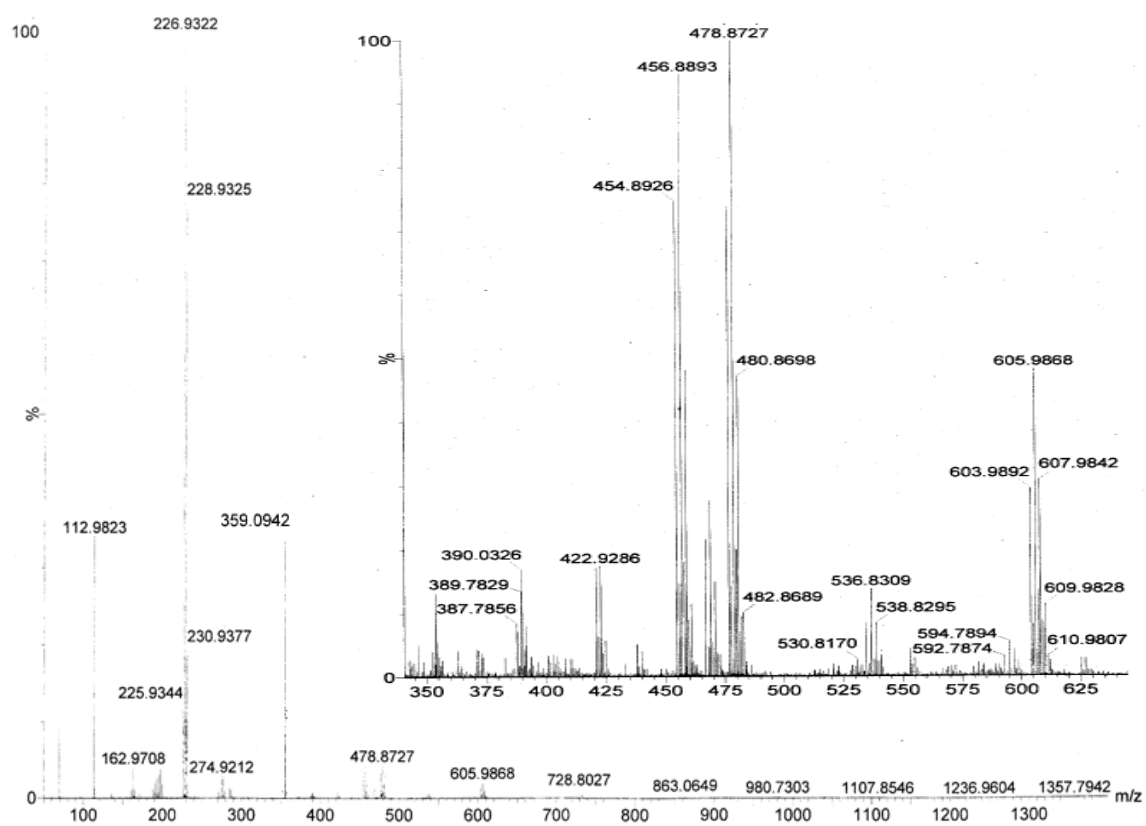

**Fig. S22** ESI-MS spectrum of **5** (Crude Product)

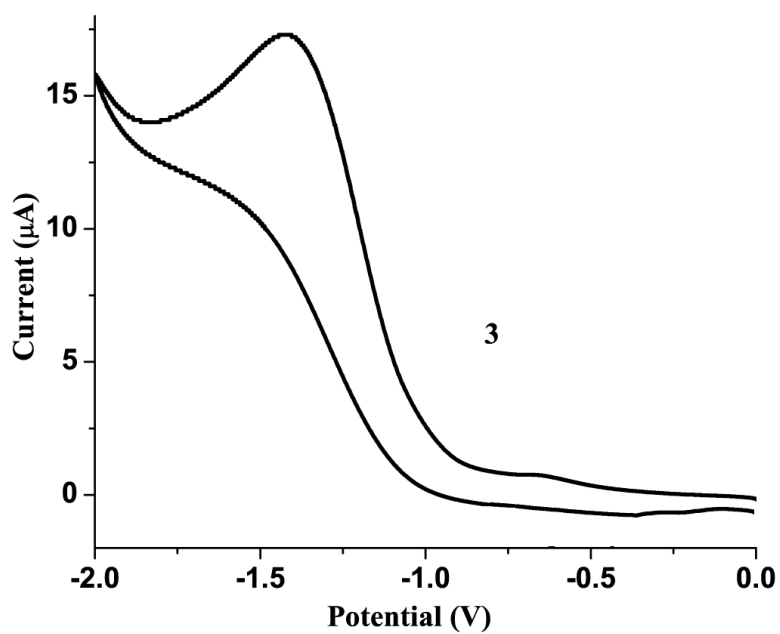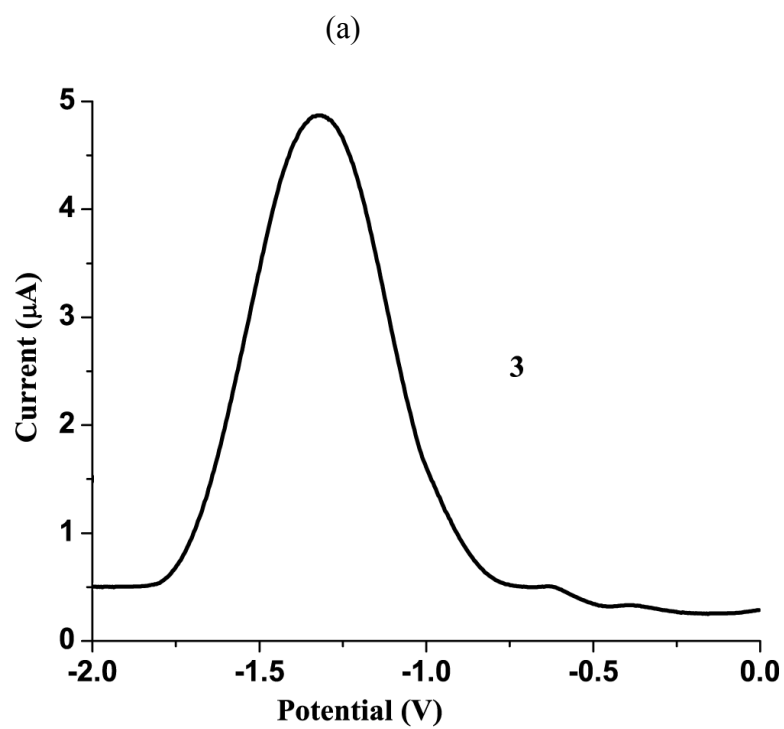

(b)

**Fig. S23** Evolution of the CV (a) and DPV (b) of **3** (*c*, 100 μM, MeCN) at room temperature



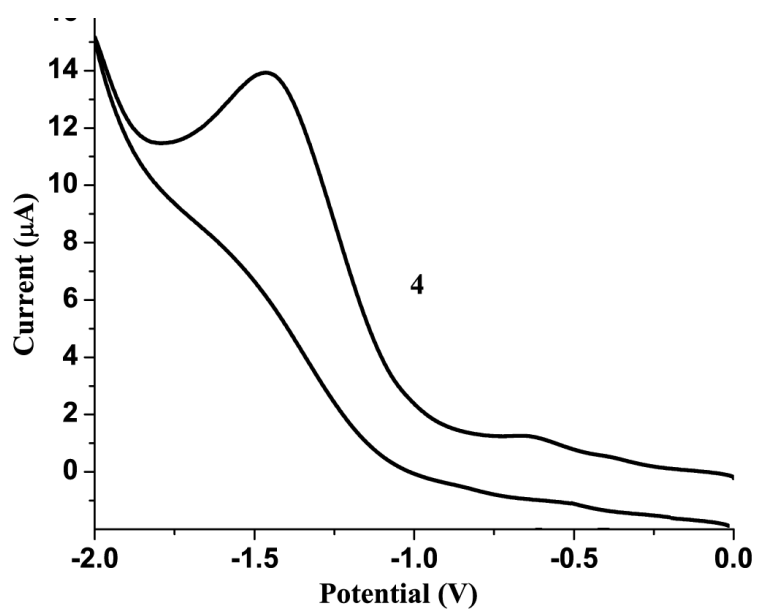

(a)

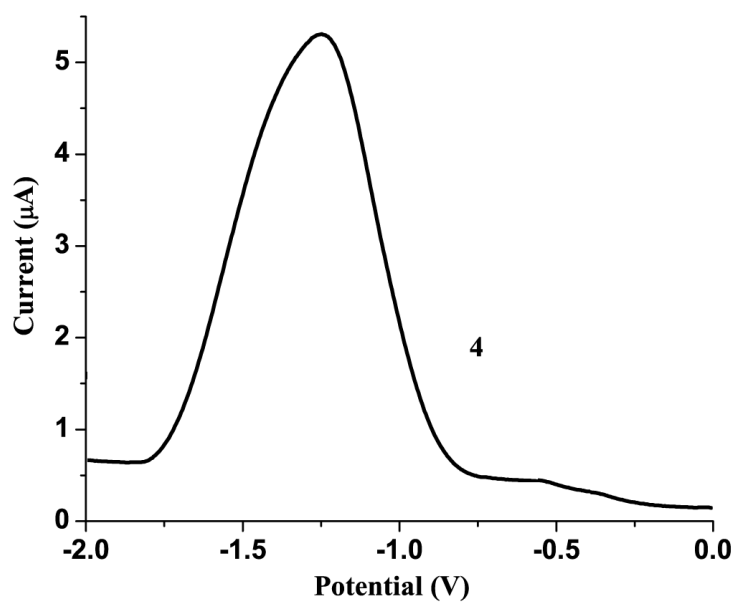

(b)

**Fig. S24** Evolution of the CV (a) and DPV (b) of 4 (c, 100  $\mu\text{M}$ , MeCN) at room temperature
